# Supplementary material for: Formation and Growth of Intermetallic Compounds during Reactions between Liquid Gallium and Solid Nickel
Source: MDPI journal article supplement (doi:10.3390/ma14195694), 2021-09-30
Supplement: s1 [file s1]

# Formation and Growth of Intermetallic Compounds during Reactions between Liquid Gallium and Solid Nickel

Doyoung Lee <sup>1,†</sup>, Chang-Lae Kim <sup>2,†</sup> and Yoonchul Sohn <sup>1,\*</sup>

<sup>1</sup> Department of Welding and Joining Science Engineering, Chosun University, Gwangju, 61452, South Korea; [ldy6744@naver.com](mailto:ldy6744@naver.com), [yoonchul.son@chosun.ac.kr](mailto:yoonchul.son@chosun.ac.kr)

<sup>2</sup> Department of Mechanical Engineering, Chosun University, Gwangju, 61452, South Korea; [kimcl@chosun.ac.kr](mailto:kimcl@chosun.ac.kr)

† These authors contributed equally to this work.

\* Correspondence: [yoonchul.son@chosun.ac.kr](mailto:yoonchul.son@chosun.ac.kr)

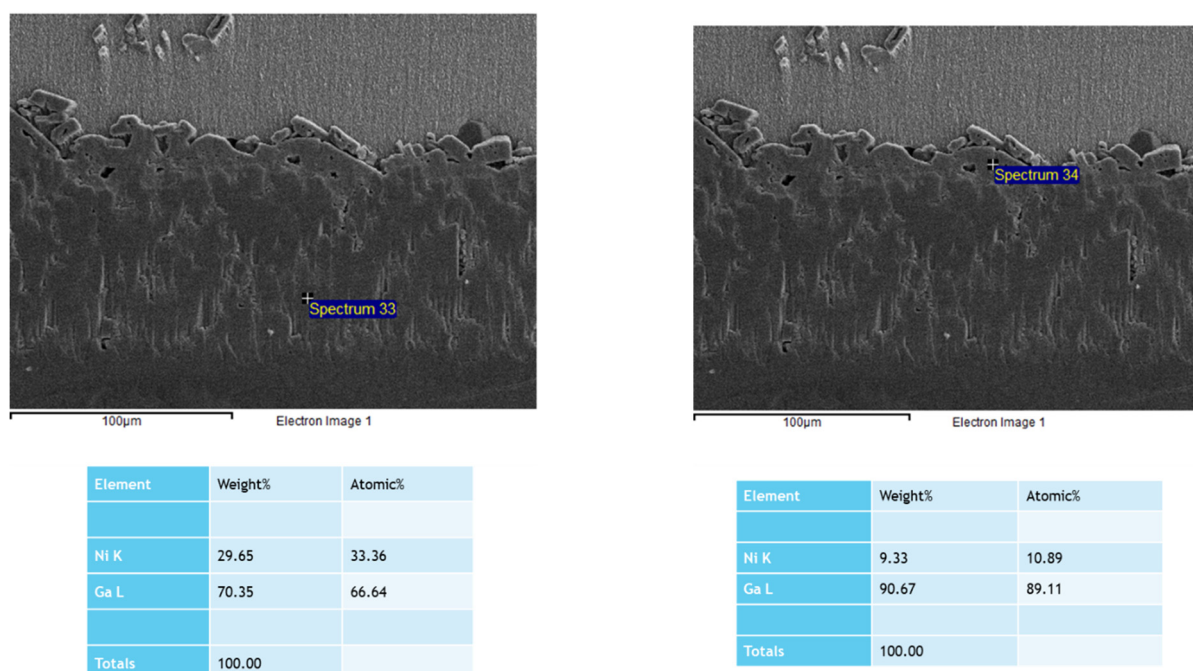

**Figure S1.** EDX analysis of the interfacial IMCs in the specimen reacted at 300 °C for 180 min.

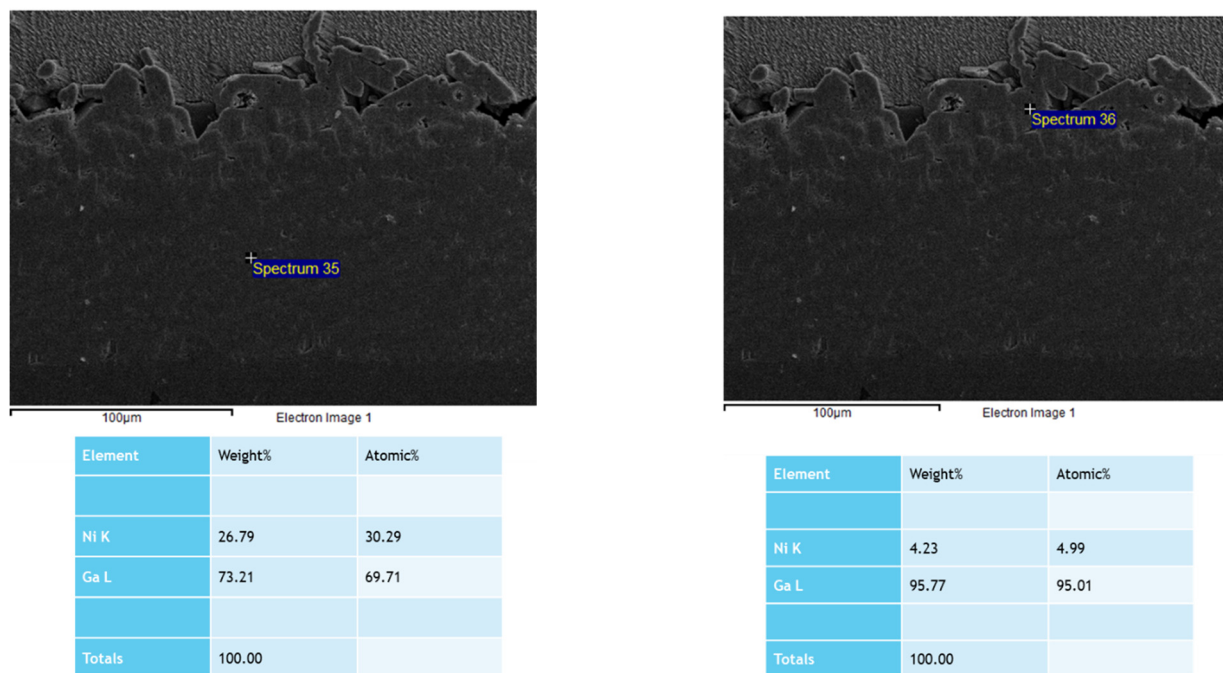

**Figure S2.** EDX analysis of the interfacial IMCs in the specimen reacted at 300 °C for 240 min.

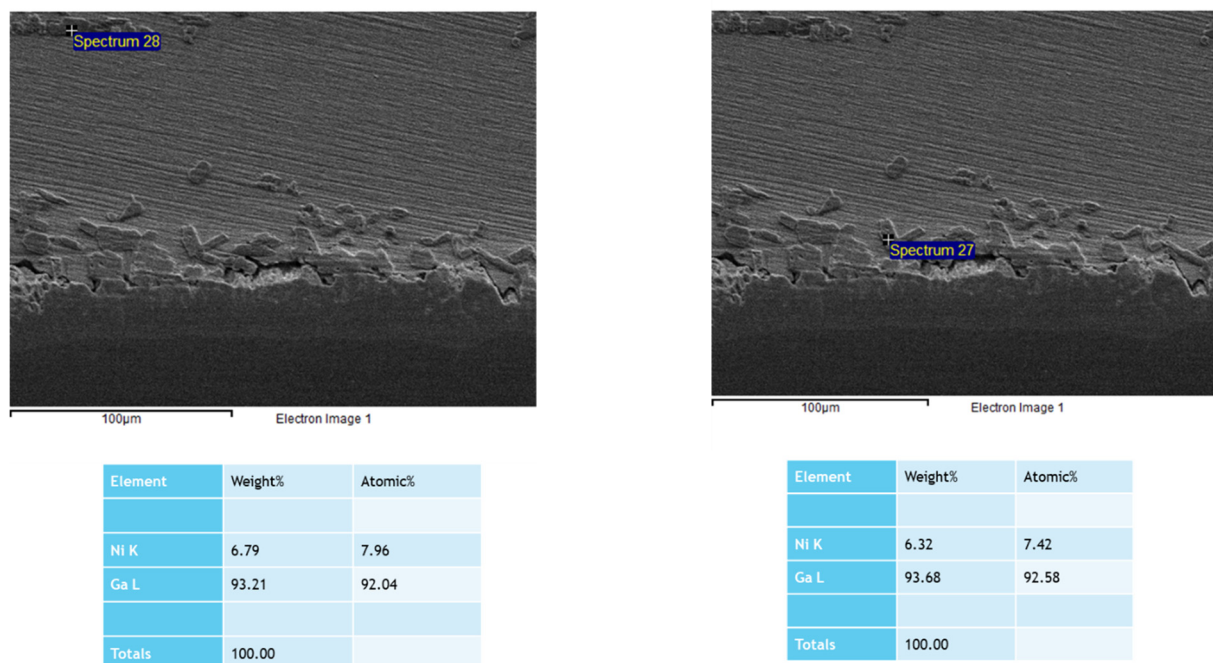

**Figure S3.** EDX analysis of the interfacial IMCs in the specimen reacted at 350 °C for 60 min.

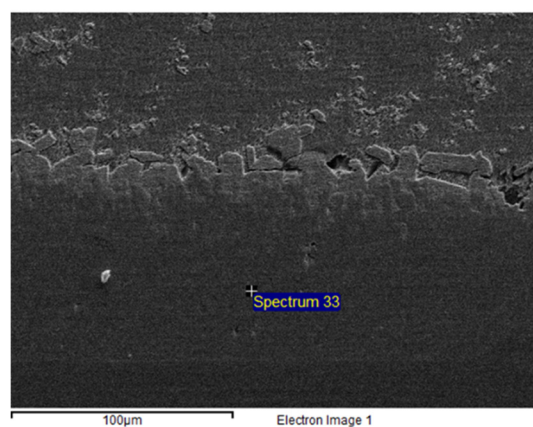

| Element | Weight% | Atomic% |
|---------|---------|---------|
| Ni K    | 25.65   | 29.06   |
| Ga L    | 74.35   | 70.94   |
| Totals  | 100.00  |         |

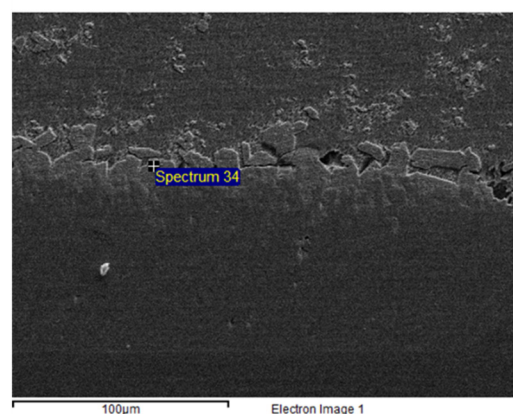

| Element | Weight% | Atomic% |
|---------|---------|---------|
| Ni K    | 8.23    | 9.62    |
| Ga L    | 91.77   | 90.38   |
| Totals  | 100.00  |         |

**Figure S4.** EDX analysis of the interfacial IMCs in the specimen reacted at 350 °C for 240 min.
